# Supplementary material
Source: publisher figshare collection journal article supplement (https://tandf.figshare.com/ndownloader/files/9160489)
Supplement: Supplementary file 1 [file 9160489]

## Supplementary data

Table 2. Excluded studies with reasoning after reading full manuscripts

| Study                      | Country               | Reason for exclusion                                                             |
|----------------------------|-----------------------|----------------------------------------------------------------------------------|
| Kumar et al. (2015)        | United Kingdom        | Uses subgroup of cohort completely used in Pandit et al. (2015)                  |
| Hamilton et al. (2016)     | United Kingdom        | Uses subgroup of cohort completely used in Pandit et al. (2015)                  |
| Mercier et al. (2010)      | France                | Study using the Oxford phase 2 prosthesis                                        |
| Price et al. (2011)        | Sweden/United Kingdom | Uses cohort of Oxford phase 1, 2 and 3. Reports results of all implants combined |
| Faour-Martin et al. (2015) | Spain                 | Uses subgroup previous cohort from Faour-Martin et al. (2013).                   |
| Emerson et al. (2008)      | USA                   | Cohort using the Oxford Phase 2 implant                                          |
| Pandit et al. (2010)       | United Kingdom        | Uses same cohort as more recent paper published by Pandit et al. (2015)          |
| Jones et al. (2012)        | United Kingdom        | Uses same cohort as paper published by Bottomley et al. (2016)                   |

Table 3. Total number of revisions and re-operations reported for Oxford Phase 3 medial UKA reported in the literature

| Study                      | No. of knees | Mean follow up (years) | No. of revisions | Causes of revisions                                                                                                                                                                                                                                                                                                                                            | No. of re-operations | Causes of re-operations                                                                                                                                                                      | No. of non-revision re-operations |
|----------------------------|--------------|------------------------|------------------|----------------------------------------------------------------------------------------------------------------------------------------------------------------------------------------------------------------------------------------------------------------------------------------------------------------------------------------------------------------|----------------------|----------------------------------------------------------------------------------------------------------------------------------------------------------------------------------------------|-----------------------------------|
| Alnachoukati et al. (2016) | 825          | 9.7                    | 93               | 19 tibial loosening<br>5 tibial and femoral loosening<br>6 tibial collapse<br>22 arthritic progression<br>2 tibial overload<br>1 loose body removal<br>7 femoral loosening<br>13 unknown<br>5 bearing dislocation<br>1 tibial fracture<br>1 instability<br>1 car accident<br>1 infection<br>3 pain<br>1 RA<br>3 chronic hemarthrosis<br>2 polywear impingement | n.r.                 | n.r.                                                                                                                                                                                         | n.r.                              |
| Aly et al. (2010)          | 45           | 8.75                   | 2                | 2 revisions to TKA<br>(1 fracture of medial tibial plateau after fall, 1 aseptic loosening)                                                                                                                                                                                                                                                                    | n.r.                 | n.r.                                                                                                                                                                                         | n.r.                              |
| Bottomley et al. (2016)    | 1,084        | 5.2                    | 46               | 12 aseptic loosening<br>13 lateral progression<br>7 infection<br>5 unexplained pain<br>7 bearing dislocation<br>1 tibial fracture<br>1 unknown                                                                                                                                                                                                                 | 69                   | Same as revisions.<br>Additionally:<br>15 exploratory arthroscopy<br>3 washout of wound and evacuation of hematoma<br>3 MUA<br>1 excision wound neuroma<br>1 open exploration<br>impingement | 23                                |

Table 3. Continued

| Study                      | No. of knees | Mean follow up (years) | No. of revisions | Causes of revisions                                                                                                                                                                                                                                                         | No. of re-operations | Causes of re-operations                                                                  | No. of non-revision re-operations |
|----------------------------|--------------|------------------------|------------------|-----------------------------------------------------------------------------------------------------------------------------------------------------------------------------------------------------------------------------------------------------------------------------|----------------------|------------------------------------------------------------------------------------------|-----------------------------------|
| Campi et al. (2017)        | 1,000        | 7                      | 25               | 11 progression of arthritis in lateral compartment<br>7 bearing dislocation<br>2 tibial fractures<br>2 tibial component loosening<br>1 persistent pain<br>1 impingement<br>1 ACL tear                                                                                       | 29                   | Revisions plus<br>2 washout<br>1 MUA<br>1 arthroscopy                                    | 4                                 |
| Edmonson et al. (2015)     | 364          | 5.5                    | 26               | 9 lateral compartment OA<br>5 combination of lateral and patellofemoral OA<br>6 aseptic loosening<br>4 dislocated bearing<br>2 unexplained medial pain                                                                                                                      | 29                   | Revisions plus<br>1 washout<br>2 MUA                                                     | 3                                 |
| Emerson et al. (2016)      | 213          | 10                     | 20               | 3 chronic hemarthrosis<br>2 loose femoral components<br>2 loose tibial components<br>9 progression of OA in lateral compartment<br>1 bearing dislocation<br>1 polyethylene wear<br>2 unknown                                                                                | n.r.                 | n.r.                                                                                     | n.r.                              |
| Faour-Martin et al. (2013) | 511          | 10.38                  | 29               | 15 infection<br>2 bearing exchange<br>8 persistent pain<br>4 aseptic loosening tibial component                                                                                                                                                                             | 31                   | Revisions plus<br>2 MUA                                                                  | 2                                 |
| Kendall et al. (2016)      | 523          | 3.92                   | 29               | 6 unexplained pain<br>5 lateral OA<br>5 tibial component loosening<br>3 tibial and femoral component loosening<br>1 femoral loosening<br>1 infection<br>2 single-stage bearing exchange with debridement for infection<br>6 arthrotomy with bearing exchange                | 38                   | Revisions plus<br>1 femoral reimplantation for dislocation<br>5 MUA<br>3 wound revisions | 9                                 |
| Kornilov et al. (2016)     | 252          | n.r.                   | 19               | 8 loosening of tibial component<br>3 periprosthetic joint infection<br>2 OA progression<br>3 fracture of medial tibial/femoral condyle<br>2 bearing dislocation with ACL and MCL rupture<br>1 complete rupture ACL and MCL                                                  | 21                   | Revisions plus<br>1 lateral meniscus tear<br>1 loose body formation                      | 2                                 |
| Kim et al. (2015)          | 166          | 10                     | 16               | 7 bearing dislocations<br>1 bearing wear and breakage<br>1 MCL rupture with bearing dislocation<br>3 femoral component loosening<br>1 femoral and tibial component loosening<br>1 component loosening with bearing dislocation<br>1 tibial condylar fracture<br>1 Infection | n.r.                 | n.r.                                                                                     | n.r.                              |

Table 3. Continued

| Study                                                                                                                                                                                           | No. of knees | Mean follow up (years) | No. of revisions | Causes of revisions                                                                                                                                                                                                                                                                                                                       | No. of re-operations | Causes of re-operations | No. of non-revision re-operations |
|-------------------------------------------------------------------------------------------------------------------------------------------------------------------------------------------------|--------------|------------------------|------------------|-------------------------------------------------------------------------------------------------------------------------------------------------------------------------------------------------------------------------------------------------------------------------------------------------------------------------------------------|----------------------|-------------------------|-----------------------------------|
| Kristensen et al. (2013)                                                                                                                                                                        | 695          | 4.6                    | 51               | 8 aseptic loosening of tibial component<br>1 aseptic loosening of femoral component<br>2 aseptic loosening of both components<br>14 progressive OA in lateral compartment<br>2 progression of retropatellar OA<br>10 pain without loosening<br>4 deep infection<br>2 periprosthetic fracture<br>2 malposition<br>4 instability<br>2 other | n.r.                 | n.r.                    | n.r.                              |
| Lisowski et al. (2016)                                                                                                                                                                          | 138          | 11.7                   | 11               | 4 pain<br>6 disease progression laterally                                                                                                                                                                                                                                                                                                 | n.r.                 | n.r.                    | n.r.                              |
| Pandit et al. (2015)                                                                                                                                                                            | 1,000        | 10.3                   | 52               | 1 bearing dislocation<br>25 progressive OA in lateral compartment<br>7 bearing dislocation<br>7 unexplained pain<br>1 unknown<br>6 infection<br>1 ACL injury<br>1 ANV lateral femoral condyle<br>1 tibial malposition<br>1 aseptic loosening femur<br>1 aseptic loosening tibia<br>1 instability                                          | n.r.                 | n.r.                    |                                   |
| White et al. (2016)                                                                                                                                                                             | 563          | 6.6                    | 16               | 6 progressive arthritis<br>4 instability<br>3 unexplained pain<br>1 aseptic loosening<br>1 infection                                                                                                                                                                                                                                      | n.r.                 | n.r.                    | n.r.                              |
| Yoshida et al. (2013)                                                                                                                                                                           | 1,279        | 5.2                    | 25               | 1 periprosthetic fracture<br>1 bearing rotation<br>2 periprosthetic fracture tibia<br>9 bearing dislocation<br>12 tibial subsidence of component<br>1 progression lateral OA                                                                                                                                                              | n.r.                 | n.r.                    | n.r.                              |
| Total                                                                                                                                                                                           | 8,658        |                        | 460 <sup>a</sup> |                                                                                                                                                                                                                                                                                                                                           | 217 <sup>b</sup>     |                         | 43 <sup>c</sup>                   |
| <sup>a</sup> 5.3% revisions out of 8,658 cases<br><sup>b</sup> 5.8% re-operations out of 3,734 cases<br><sup>c</sup> 1.2% non-revision re-operations out of 3,734 cases<br>n.r. = not reported. |              |                        |                  |                                                                                                                                                                                                                                                                                                                                           |                      |                         |                                   |

**Table 5. Incidence of causes for revision (460 revisions from 8,658 cases). This is reported from the total number of cases from papers which gave details of the causes of revisions**

| Reasons for revisions         | No. of cases | Incidence rate (%) |
|-------------------------------|--------------|--------------------|
| Lateral disease progression   | 123          | 1.42               |
| Aseptic loosening             | 108          | 1.25               |
| Bearing dislocation           | 50           | 0.58               |
| Pain                          | 49           | 0.57               |
| Infection                     | 41           | 0.47               |
| Other                         | 24           | 0.28               |
| Unknown                       | 17           | 0.20               |
| Periprosthetic fracture       | 14           | 0.16               |
| Instability                   | 10           | 0.12               |
| Other bearing issues          | 8            | 0.09               |
| Chronic hemarthrosis          | 6            | 0.07               |
| Polyethylene wear             | 5            | 0.06               |
| Lateral and patellofemoral OA | 5            | 0.06               |
| Malposition                   | 3            | 0.03               |
| Retropatellar OA              | 2            | 0.02               |

**Table 6. Studies reporting the number of re-operations and mean follow-up period**

| Study                      | No. of knees | Re-operations | Non-revision re-operations | Mean follow-up (years) | Observed component years | Annual re-operations rate (95% CI) | Annual non-revision re-operations rate (95% CI) |
|----------------------------|--------------|---------------|----------------------------|------------------------|--------------------------|------------------------------------|-------------------------------------------------|
| Bottomley et al. (2016)    | 1,084        | 69            | 23                         | 5.2                    | 5,636.8                  | 1.22 (0.95–1.55)                   | 0.41 (0.26–0.61)                                |
| Campi et al. (2017)        | 1,000        | 29            | 4                          | 7                      | 7,000                    | 0.41 (0.28–0.59)                   | 0.06 (0.02–0.15)                                |
| Edmonson et al. (2015)     | 364          | 29            | 3                          | 5.5                    | 2,002                    | 1.45 (0.97–2.07)                   | 0.15 (0.03–0.44)                                |
| Faour-Martin et al. (2013) | 511          | 31            | 2                          | 10.4                   | 5,304.2                  | 0.58 (0.40–0.83)                   | 0.04 (0.00–0.14)                                |
| Kendall (2016)             | 523          | 38            | 9                          | 3.9                    | 2,044.9                  | 1.86 (1.32–2.54)                   | 0.44 (0.20–0.83)                                |
| Total                      | 3,482        | 196           | 41                         |                        | 21,988                   | 0.89 (0.77–1.02)                   | 0.19 (0.13–0.25)                                |

These studies were used to calculate the total number of re-operations and observed component years, which were subsequently used to calculate the overall re-operations/non-revision re-operations per 100 observed component years.

**Table 7. Studies reporting the survival of Oxford UKA and their sample sizes (n = 8,361)**

| Study                    | Location                              | No. of knees | 10-year survival (%) (95% CI) | 15-year survival (%) (95% CI) |
|--------------------------|---------------------------------------|--------------|-------------------------------|-------------------------------|
| Alnachoukati et al. 2016 | Ohio/North Carolina, Texas, USA       | 825          | 85                            | n.r.                          |
| Bottomley et al. 2016    | Oxford, UK                            | 1084         | 93 (86–100)                   | n.r.                          |
| Campi et al. 2017        | Oxford, UK/Christ Church, New Zealand | 1000         | 97 (93–100)                   | n.r.                          |
| Edmondson et al. 2015    | East Sussex, UK                       | 364          | 88 (83–93)                    | n.r.                          |
| Emerson et al. 2016      | Texas, USA                            | 213          | 88 (82–94)                    | n.r.                          |
| Faour-Martin et al. 2013 | Spain                                 | 511          | 96                            | n.r.                          |
| Kendall 2016             | Canada                                | 523          | n.r.                          | 96                            |
| Kim et al. 2015          | Seoul, Korea                          | 166          | 91 (86–95)                    | n.r.                          |
| Kristenen et al. 2013    | Vejle, Denmark                        | 695          | 85 (79–90)                    | n.r.                          |
| Lisowski et al. 2016     | Amsterdam, Netherlands                | 138          | n.r.                          | 91 (85–96)                    |
| Pandit et al. 2015       | Oxford, UK                            | 1000         | 96 (93–100)                   | 91 (83–98)                    |
| White et al. 2016        | Oswestry, UK                          | 563          | 95                            | n.r.                          |
| Yoshida et al. 2013      | Japan                                 | 1279         | 95 (91–100)                   | n.r.                          |

n.r. = not reported.

Table 8. Studies reporting preoperative and postoperative PROMs in their cohorts (n = 5,177)

| Study                    | No. of knees | Age (range) | Gender       | BMI (SD) | Preop. PROMS                                                                  | 10-year PROMS                                                                 |
|--------------------------|--------------|-------------|--------------|----------|-------------------------------------------------------------------------------|-------------------------------------------------------------------------------|
| Alnachoukati et al. 2016 | 825          | 64          | 47% M, 53% F | 32       | n.r.                                                                          | AKSS-O 90, AKSS-F 77                                                          |
| Aly et al. 2010          | 45           | 57 (46–53)  | 18 M, 25 F   | n.r.     | HSS 74 (range 60–84)                                                          | HSS 178 (range 78–198)                                                        |
| Campi et al. 2017        | 1,000        | 66 (35–94)  | n.r.         | n.r.     | OKS 23 (SD 8)                                                                 | OKS 42 (SD 7)                                                                 |
| Emerson et al. 2016      | 213          | 67 (38–89)  | 95 M, 78 F   | 30       | AKSS-O 50, AKSS-F 56                                                          | AKSS-O 93, AKSS-F 78                                                          |
| Faour-Martin et al. 2013 | 511          | 59 (SD 9)   | 115 M, 287 F | 27 (5)   | AKSS-O 52 (SD 12),<br>AKSS-F 51 (SD 19)                                       | AKSS-O 90 (SD 8),<br>AKSS-F 89 (SD 18)                                        |
| Kim et al. 2015          | 166          | 62 (45–84)  | 5 M, 123 F   | n.r.     | AKSS-O 54 (range 25–70),<br>AKSS-F 56 (range 35–80)                           | AKSS-O 85 (SD 9),<br>AKSS-F 81 (SD 12)                                        |
| Lisowski et al. 2016     | 138          | 72 (47–91)  | n.r.         | 28 (5)   | OKS 19 (SD 7),<br>KSS 47 (SD 18)                                              | OKS 42 (SD 6),<br>KSS 81 (SD 21)                                              |
| Pandit et al. (2015)     | 1,000        | 66 (32–88)  | 393 M, 425 F | n.r.     | OKS 25 (SD 9),<br>Tegner 2 (SD 1),<br>AKSS-F 69 (SD 18),<br>AKSS-O 47 (SD 20) | OKS 40 (SD 9),<br>Tegner 3 (SD 1),<br>AKSS-F 76 (SD 22),<br>AKSS-O 80 (SD 15) |
| Yoshida et al. 2013      | 1,279        | 77 (47–94)  | 180 M, 810 F | n.r.     | OKS 22 (SD 8)                                                                 | OKS 38 (SD 7)                                                                 |

AKSS-O = American Knee Score Objective, AKSS-F = American Knee Score Functional, HSS = Hospital for Special Surgery Knee Score, OKS = Oxford Knee Score. n.r. = not reported.

## APPENDIX 1

### Ovid Medline search strategy

- 1 exp knee arthroplasty/
- 2 "knee replace\*".ti,ab.
- 3 "knee arthroplasty".ti,ab.
- 4 "knee reconstruction".ti,ab.
- 5 1 or 2 or 3 or 4
- 6 partial.ti,ab.
- 7 unicompartamental.ti,ab.
- 8 unicondylar.ti,ab.
- 9 uni.ti,ab.
- 10 UKA.ti,ab.
- 11 UKR.ti,ab.
- 12 UCA.ti,ab.
- 13 UCR.ti,ab.
- 14 PKA.ti,ab.
- 15 PKR.ti,ab.
- 16 PCA.ti,ab.
- 17 Oxford.ti,ab.
- 18 meniscal.ti,ab.
- 19 mobile.ti,ab.
- 20 6 or 7 or 8 or 9 or 10 or 11 or 12 or 13 or 14 or 15 or 16 or 17 or 18 or 19
- 21 5 and 20
- 22 1 and 20
- 23 21
- 24 limit 23 to yr="2008 -Current"
- 25 exp treatment outcome/
- 26 exp follow up/
- 27 (ten or "10-year" or "10 year" or "10year").ti,ab.
- 28 (fifteen or "15-year" or "15 year" or "15year").ti,ab.
- 29 long\*.ti,ab.
- 30 25 or 26 or 27 or 28 or 29
- 31 5 and 20 and 30
- 32 31
- 33 limit 32 to yr="2008 -Current"
- 34 33
- 35 medial.mp. [mp=title, abstract, original title, name of substance word, subject heading word, keyword heading word, protocol supplementary concept word, rare disease supplementary concept word, unique identifier]
- 36 34 and 35
- 37 exp Cohort Studies/
- 38 25 or 27 or 28 or 29 or 37
- 39 5 and 20 and 35 and 38
- 40 39
- 41 limit 40 to yr="2008 -Current"

### EMBASE search strategy

- 1 exp knee arthroplasty/
- 2 "knee replace\*".ti,ab.

- 3 "knee arthroplasty".ti,ab.
- 4 "knee reconstruction".ti,ab.
- 5 1 or 2 or 3 or 4
- 6 partial.ti,ab.
- 7 unicompartamental.ti,ab.
- 8 unicondylar.ti,ab.
- 9 uni.ti,ab.
- 10 UKA.ti,ab.
- 11 UKR.ti,ab.
- 12 UCA.ti,ab.
- 13 UCR.ti,ab.
- 14 PKA.ti,ab.
- 15 PKR.ti,ab.
- 16 PCA.ti,ab.
- 17 Oxford.ti,ab.
- 18 meniscal.ti,ab.
- 19 mobile.ti,ab.
- 20 6 or 7 or 8 or 9 or 10 or 11 or 12 or 13 or 14 or 15 or 16 or 17 or 18 or 19
- 21 5 and 20
- 22 1 and 20
- 23 21
- 24 limit 23 to yr="2008 -Current"
- 25 exp treatment outcome/
- 26 exp follow up/
- 27 (ten or "10-year" or "10 year" or "10year").ti,ab.
- 28 (fifteen or "15-year" or "15 year" or "15year").ti,ab.
- 29 long\*.ti,ab.
- 30 25 or 26 or 27 or 28 or 29
- 31 5 and 20 and 30
- 32 31
- 33 limit 32 to yr="2008 -Current"
- 34 33
- 35 medial.mp. [mp=title, abstract, heading word, drug trade name, original title, device manufacturer, drug manufacturer, device trade name, keyword, floating subheading] (144350)
- 36 33 and 35

### CENTRAL search strategy

#### ID Search Hits

- #1 MeSH descriptor: [Arthroplasty, Replacement, Knee] explode all trees
- #2 "knee replace"
- #3 "knee arthroplasty"
- #4 "knee reconstruction"
- #5 #2 or #3 or #4 or #1
- #6 partial or unicompartamental or unicondylar or uni or UKA or UKR or UCA or UCR or PKA or PCR or Oxford or meniscal or mobile
- #7 medial
- #8 #5 and #6 and #7

## APPENDIX 2

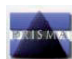

### PRISMA (Preferred Reporting Items for Systematic Reviews and Meta-Analyses) Checklist

[www.prisma-statement.org](http://www.prisma-statement.org)

You must report the page number in your manuscript where you consider each of the items listed in this checklist. If you have not included this information, either revise your manuscript accordingly before submitting or note N/A.

| Section/Topic                      | Item No. | Checklist item                                                                                                                                                                                                                                                                                              | Reported on Page No. |
|------------------------------------|----------|-------------------------------------------------------------------------------------------------------------------------------------------------------------------------------------------------------------------------------------------------------------------------------------------------------------|----------------------|
| <b>TITLE</b>                       |          |                                                                                                                                                                                                                                                                                                             |                      |
| Title                              | 1        | Identify the report as a systematic review, meta-analysis, or both.                                                                                                                                                                                                                                         | 1                    |
| <b>ABSTRACT</b>                    |          |                                                                                                                                                                                                                                                                                                             |                      |
| Structured summary                 | 2        | Provide a structured summary including, as applicable: background; objectives; data sources; study eligibility criteria, participants, and interventions; study appraisal and synthesis methods; results; limitations; conclusions and implications of key findings; systematic review registration number. | 2                    |
| <b>INTRODUCTION</b>                |          |                                                                                                                                                                                                                                                                                                             |                      |
| Rationale                          | 3        | Describe the rationale for the review in the context of what is already known.                                                                                                                                                                                                                              | 3-4                  |
| Objectives                         | 4        | Provide an explicit statement of questions being addressed with reference to participants, interventions, comparisons, outcomes, and study design (PICOS).                                                                                                                                                  | 4-5                  |
| <b>METHODS</b>                     |          |                                                                                                                                                                                                                                                                                                             |                      |
| Protocol and registration          | 5        | Indicate if a review protocol exists, if and where it can be accessed (e.g., Web address), and, if available, provide registration information including registration number.                                                                                                                               | 5                    |
| Eligibility criteria               | 6        | Specify study characteristics (e.g., PICOS, length of follow-up) and report characteristics (e.g., years considered, language, publication status) used as criteria for eligibility, giving rationale.                                                                                                      | 5-6                  |
| Information sources                | 7        | Describe all information sources (e.g., databases with dates of coverage, contact with study authors to identify additional studies) in the search and date last searched.                                                                                                                                  | 5-6                  |
| Search                             | 8        | Present full electronic search strategy for at least one database, including any limits used, such that it could be repeated.                                                                                                                                                                               | Appendix 2           |
| Study selection                    | 9        | State the process for selecting studies (i.e., screening, eligibility, included in systematic review, and, if applicable, included in the meta-analysis).                                                                                                                                                   | 5-7                  |
| Data collection process            | 10       | Describe method of data extraction from reports (e.g., piloted forms, independently, in duplicate) and any processes for obtaining and confirming data from investigators.                                                                                                                                  | 7                    |
| Data items                         | 11       | List and define all variables for which data were sought (e.g., PICOS, funding sources) and any assumptions and simplifications made.                                                                                                                                                                       | 6                    |
| Risk of bias in individual studies | 12       | Describe methods used for assessing risk of bias of individual studies (including specification of whether this was done at the study or outcome level), and how this information is to be used in any data synthesis.                                                                                      | 7                    |
